# Supplementary material
Source: PubMed Central journal article supplement (PMC3277238)

a

F4/80 staining (macrophages)

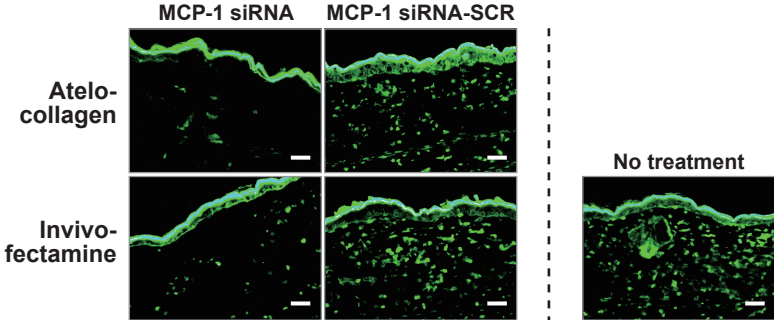

b

CD3 staining (T cells)

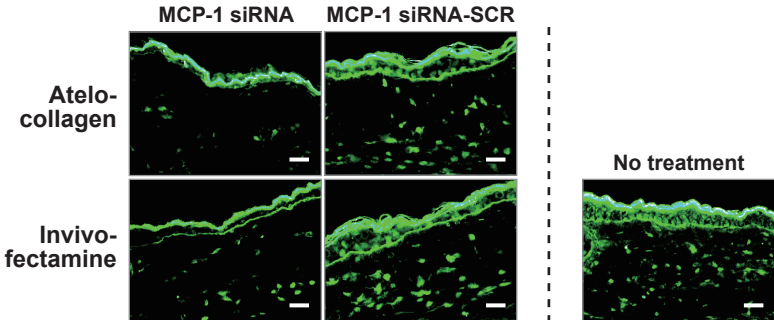

c

H&E staining

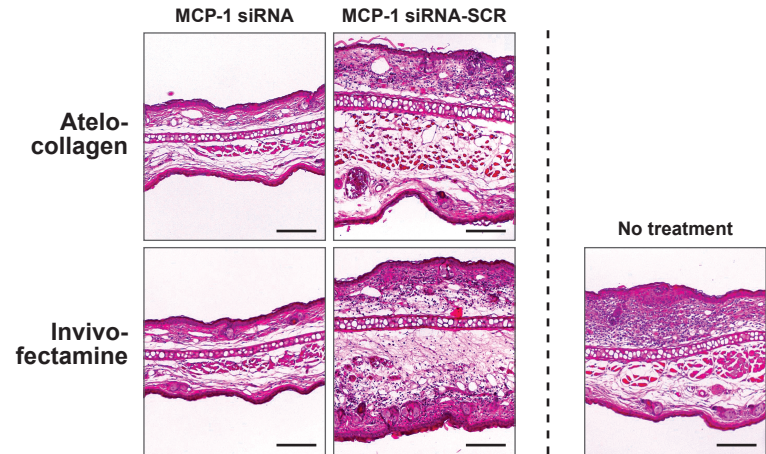

Supplement: mt2011221x4.pdf [file mt2011221x4.pdf]

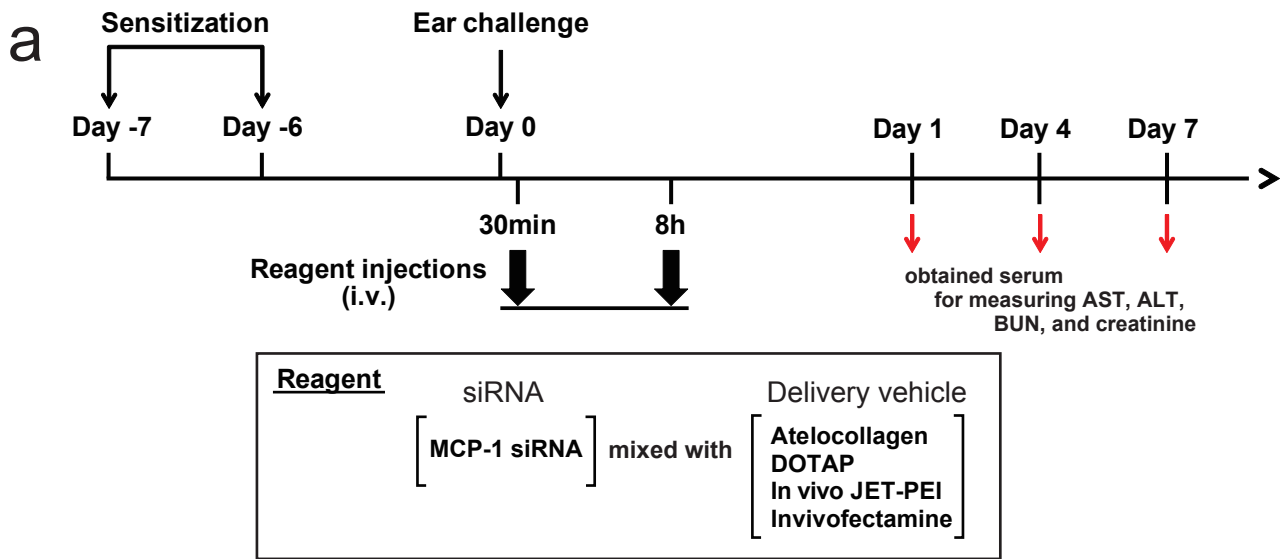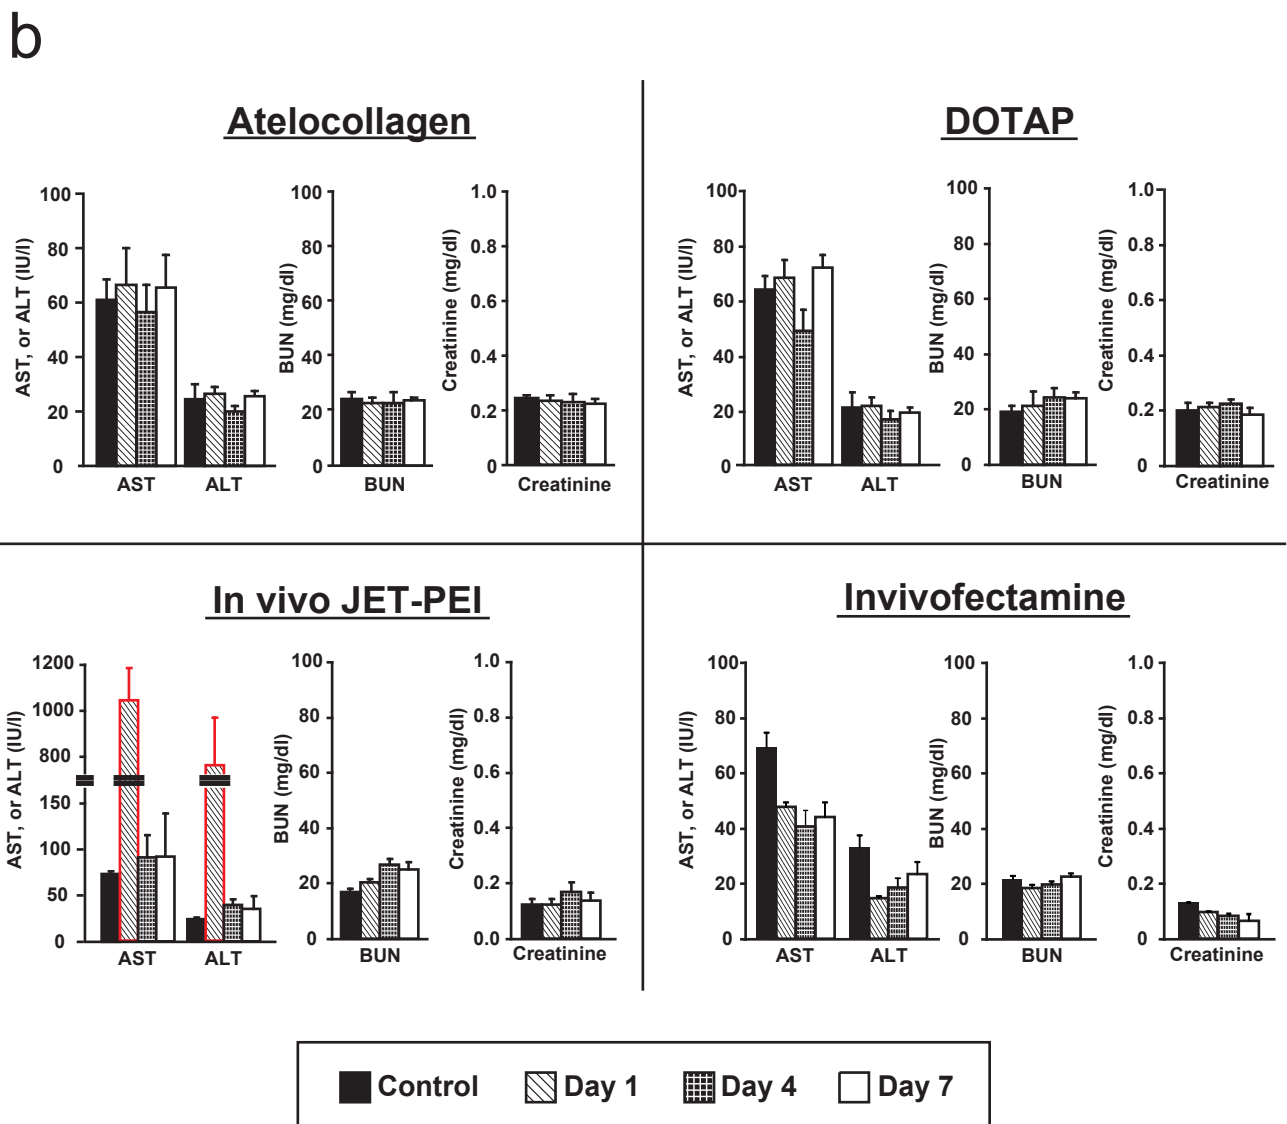

Supplement: mt2011221x7.pdf [file mt2011221x7.pdf]

a

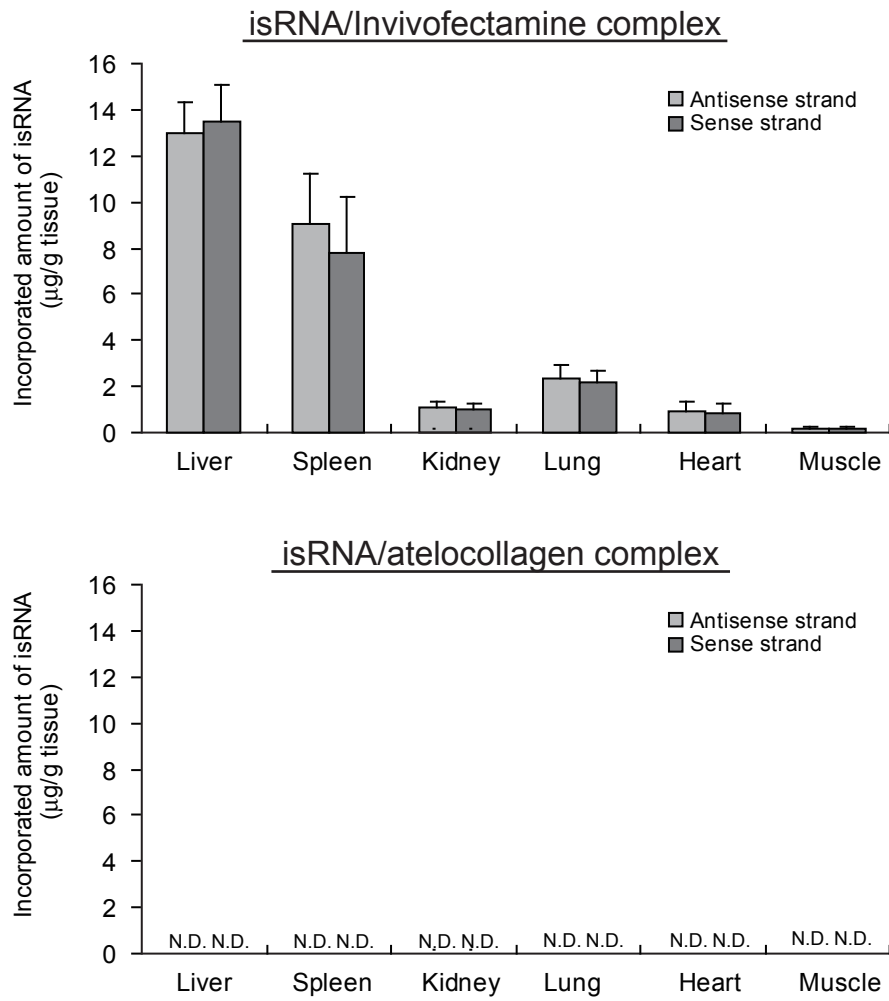

b

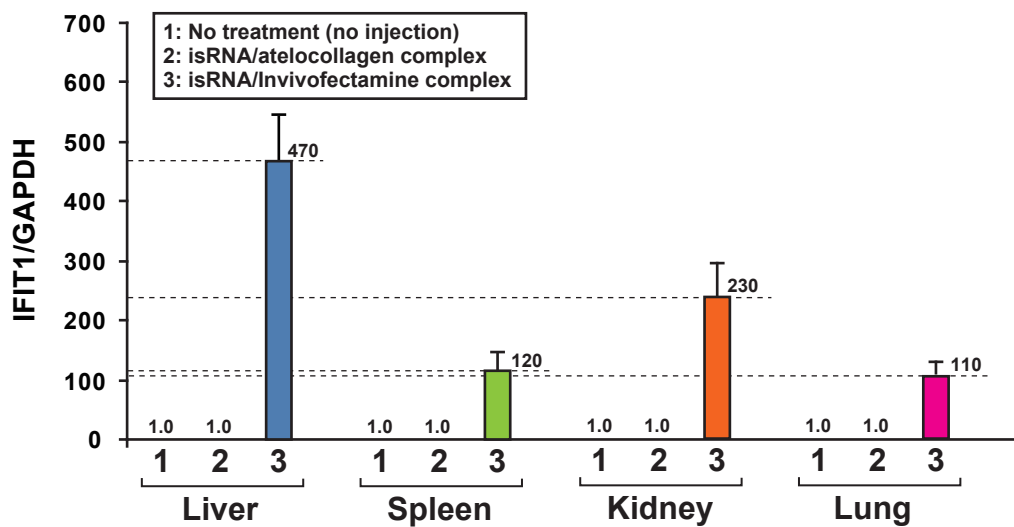

Supplement: mt2011221x8.pdf [file mt2011221x8.pdf]
